# Supplementary material
Source: HighWire-hosted journal article supplement (https://erj.ersjournals.com/content/55/4/1902355)
Supplement: inline-supplementary-material-1 [file inline-supplementary-material-1.pdf]

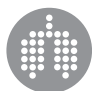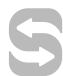

SHAREABLE PDF

# New method for rapid and dynamic quantification of elastase activity on sputum neutrophils from patients with cystic fibrosis using flow cytometry

Matthias Hagner <sup>1,2,3,10</sup>, Dario L. Frey <sup>1,2,3,10</sup>, Matteo Guerra<sup>2,3,4,5,10</sup>,  
A. Susanne Ditttrich<sup>1,2,3,6</sup>, Victoria S. Halls<sup>7</sup>, Sabine Wege<sup>2,3,6</sup>,  
Felix J.F. Herth<sup>2,3,6</sup>, Carsten Schultz<sup>2,3,4,7,11</sup> and Marcus A. Mall <sup>1,2,3,8,9,11</sup>

**Affiliations:** <sup>1</sup>Dept of Translational Pulmonology, University of Heidelberg, Heidelberg, Germany. <sup>2</sup>Translational Lung Research Center (TLRC), Heidelberg, Germany. <sup>3</sup>German Center for Lung Research (DZL), Germany. <sup>4</sup>Molecular Medicine Partnership Unit (MMPU), European Molecular Biology Laboratory, Heidelberg, Germany. <sup>5</sup>EMBL and Heidelberg University, Faculty of Biosciences, Heidelberg, Germany. <sup>6</sup>Dept of Pulmonology and Critical Care Medicine, Thoraxklinik at the University of Heidelberg, Heidelberg, Germany. <sup>7</sup>Dept of Chemical Physiology and Biochemistry, Oregon Health and Science University, Portland, OR, USA. <sup>8</sup>Dept of Pediatric Pulmonology, Immunology and Critical Care Medicine, Charité – Universitätsmedizin Berlin, Berlin, Germany. <sup>9</sup>Berlin Institute of Health, Berlin, Germany. <sup>10</sup>Equal contribution. <sup>11</sup>Equal contribution as senior author.

**Correspondence:** Marcus A. Mall, Dept of Pediatric Pulmonology, Immunology and Critical Care Medicine, Charité – Universitätsmedizin Berlin and Berlin Institute of Health, Augustenburger Platz 1, 13353 Berlin, Germany. E-mail: marcus.mall@charite.de

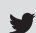

@ERSpublications

**Small molecule FRET flow cytometry is a new method that enables rapid and sensitive quantification of surface-bound elastase activity on sputum neutrophils from patients with cystic fibrosis and potentially other neutrophilic airway diseases** <http://bit.ly/2IegeSB>

**Cite this article as:** Hagner M, Frey DL, Guerra M, *et al.* New method for rapid and dynamic quantification of elastase activity on sputum neutrophils from patients with cystic fibrosis using flow cytometry. *Eur Respir J* 2020; 55: 1902355 [<https://doi.org/10.1183/13993003.02355-2019>].

This single-page version can be shared freely online.

Increased activity of the serine protease neutrophil elastase (NE), secreted by activated neutrophils in the airways, is a key risk factor for the onset and progression of structural lung damage and lung function decline in patients with cystic fibrosis (CF) and non-CF bronchiectasis [1–6]. In addition to progressive structural lung damage, increased NE activity has been implicated in mucus hypersecretion [7–9], perpetuation of airway inflammation [10], and impaired host defence against *Pseudomonas aeruginosa* infection [6, 11–13]. These studies suggest increased NE activity in sputum or bronchoalveolar lavage fluid (BALF) as a promising biomarker of airway inflammation in CF and potentially other neutrophilic airway diseases [2–4, 6].
